# Supplementary material
Source: Springer Nature journal article supplement (https://www.springermedizin.de/resource/supplementary/12913_2009_998_MOESM1_ESM.pdf/9536102)

### Primary Care Visits by Diagnosis Group

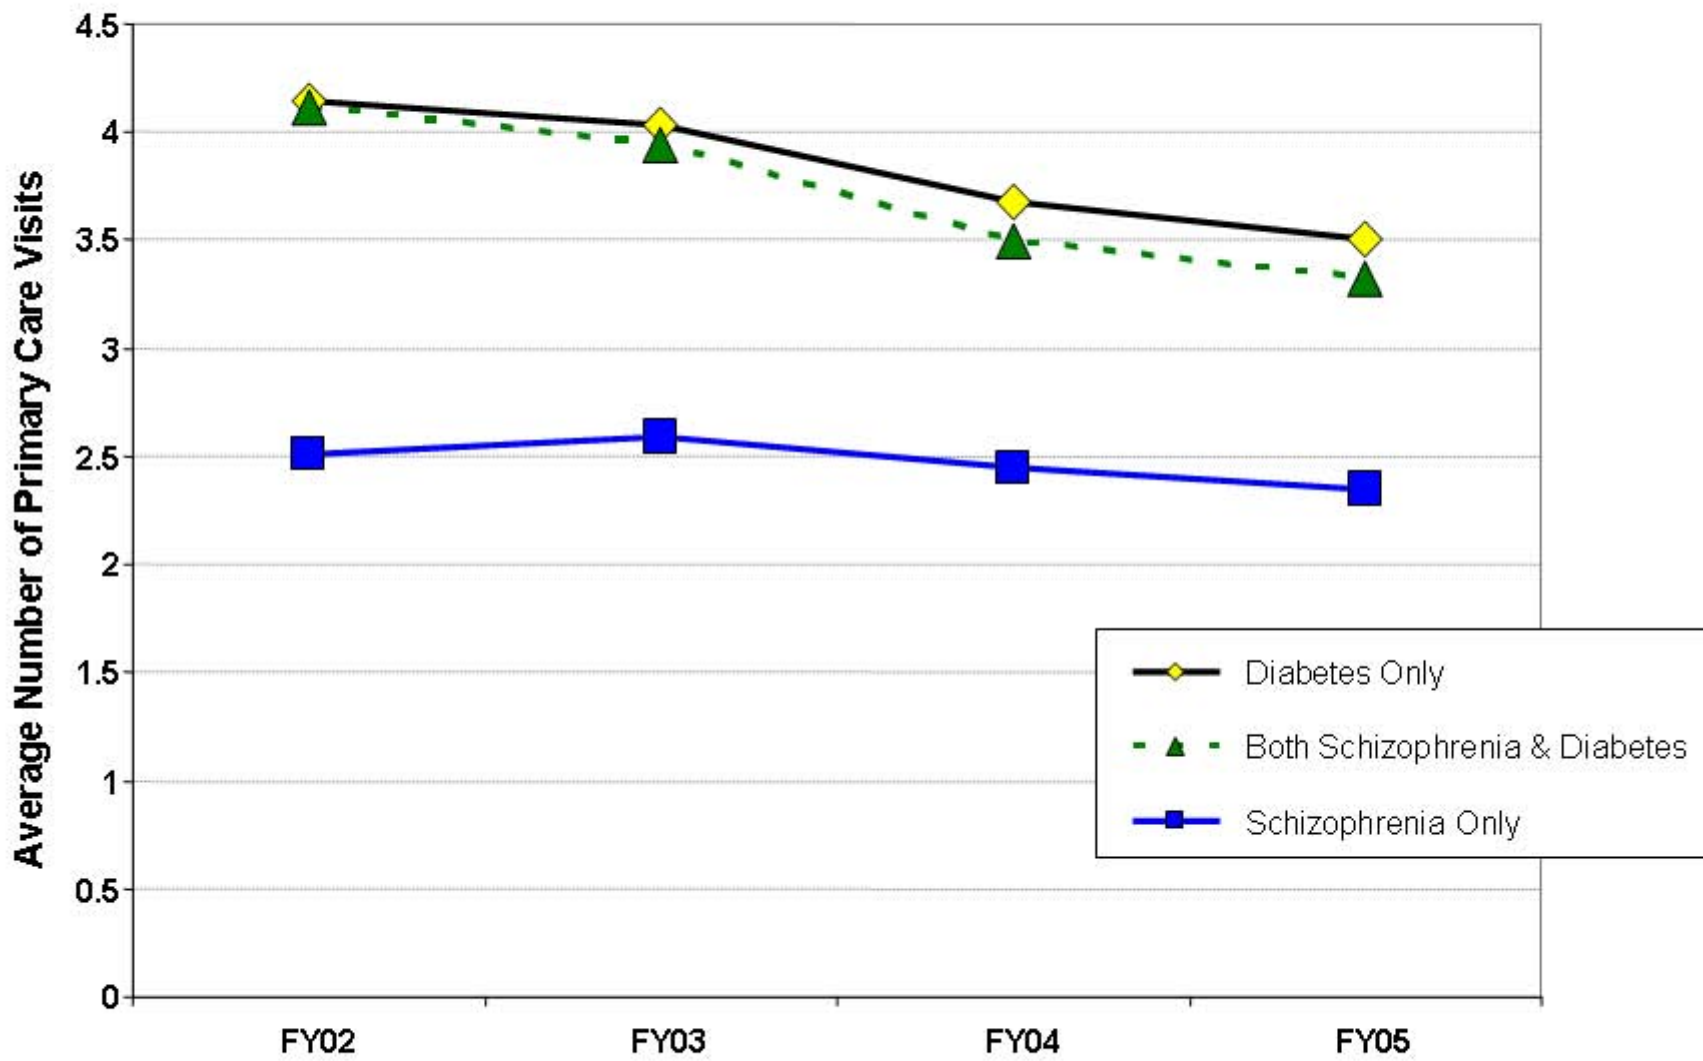

Supplement: MOESM1 [file 9536102]
